# Supplementary material for: Biodegradable Microcapsules of Poly(Butylene Adipate-co-Terephthalate) (PBAT) as Isocyanate Carriers and the Effect of the Process Parameters
Source: MDPI journal article supplement (doi:10.3390/polym15030665), 2023-01-28
Supplement: s1 [file s1]

# Biodegradable microcapsules of poly(butylene adipate-co-terephthalate) (PBAT) as isocyanate carriers and the effect of the process parameters

António Aguiar <sup>1,2,\*</sup>, António Mariquito <sup>1</sup>, Diogo Gonçalves <sup>1</sup>, Isabel Pinho <sup>2</sup> and Ana C. Marques <sup>1,\*</sup>

<sup>1</sup> CERENA, DEQ, Instituto Superior Técnico, Universidade de Lisboa, Avenida Rovisco Pais, 1049-001 Lisboa, Portugal;

<sup>2</sup> CIPADE, Av. Primeiro de Maio 121, São João da Madeira, Portugal;

\* Correspondence: antonio.luis.aguiar@tecnico.ulisboa.pt (AA); ana.marques@tecnico.ulisboa.pt (A.C.M)

## Contents

|                                                                                                                                              |    |
|----------------------------------------------------------------------------------------------------------------------------------------------|----|
| <b>Figure S1.</b> The GPC analysis performed for samples of PBAT, and MCs dissolved in chloroform.....                                       | 2  |
| <b>Figure S2.</b> <sup>1</sup> H NMR spectra of PBAT (up) and IPDI (down), in CDCl <sub>3</sub> .....                                        | 2  |
| <b>Figure S3.</b> <sup>1</sup> H NMR spectra of <b>R-MCs</b> and R-MCs with significant weight percentage of PUa, in CDCl <sub>3</sub> ..... | 3  |
| <b>Figure S4.</b> <sup>1</sup> H NMR spectra of <b>R-MCs</b> (16.5 mg) + 4-chloro-3-methylphenol (7.5 mg), in CDCl <sub>3</sub> . ....       | 3  |
| <b>Figure S5.</b> Thermogram and DTG of IPDI and PBAT.....                                                                                   | 4  |
| <b>Figure S6.</b> SEM images of the MCs before and after the dispersion in acetone. ....                                                     | 4  |
| <b>Figure S7.</b> Histogram of the particle size distribution from the MCs obtained under different mixing rates. ....                       | 5  |
| <b>Table S1.</b> Set of statistical analysis tables regarding particle size distribution obtained under different mixing rates...            | 5  |
| <b>Figure S8.</b> Histogram of the particle size distribution from the MCs obtained with different PVA amounts. ....                         | 6  |
| <b>Table S2.</b> Set of statistical analysis tables regarding particle size distribution obtained with different PVA amounts. ...            | 7  |
| <b>Figure S9.</b> Histogram of the particle size distribution from the MCs obtained with different PBAT amounts. ....                        | 8  |
| <b>Table S3.</b> Set of statistical analysis tables regarding particle size distribution obtained with different PBAT amounts.               | 9  |
| <b>Figure S10.</b> Histogram of the particle size distribution from the MCs obtained with different DCM amounts.....                         | 10 |
| <b>Table S4.</b> Set of statistical analysis tables regarding particle size distribution obtained with different DCM amounts. ....           | 10 |
| <b>Figure S11.</b> Histogram of the particle size distribution from the MCs obtained with different IPDI amounts. ....                       | 11 |
| <b>Table S5.</b> Set of statistical analysis tables regarding particle size distribution obtained with different DCM amounts. ....           | 12 |
| <b>Figure S12.</b> Optical microscopy photograph (250 rpm) and SEM images of the MCs obtained obtained under different mixing rates.....     | 13 |
| <b>Figure S13.</b> Sem images of the MCs obtained obtained with 0.5, 1 and 1.5 g of PVA .....                                                | 14 |
| <b>Figure S14.</b> TG analysis from the MCs obtained with different PVA amounts.....                                                         | 14 |
| <b>Figure S15.</b> Optical microscopy photograph from the MCs obtained with 2g of PBAT.....                                                  | 15 |
| <b>Figure S16.</b> SEM images of MCs obtained with different PBAT amounts.....                                                               | 15 |
| <b>Figure S17.</b> TG analysis from the MCs obtained with different DCM amounts.....                                                         | 16 |
| <b>Table S6.</b> Variation of the viscosity of the emulsions with the increase of IPDI. ....                                                 | 16 |

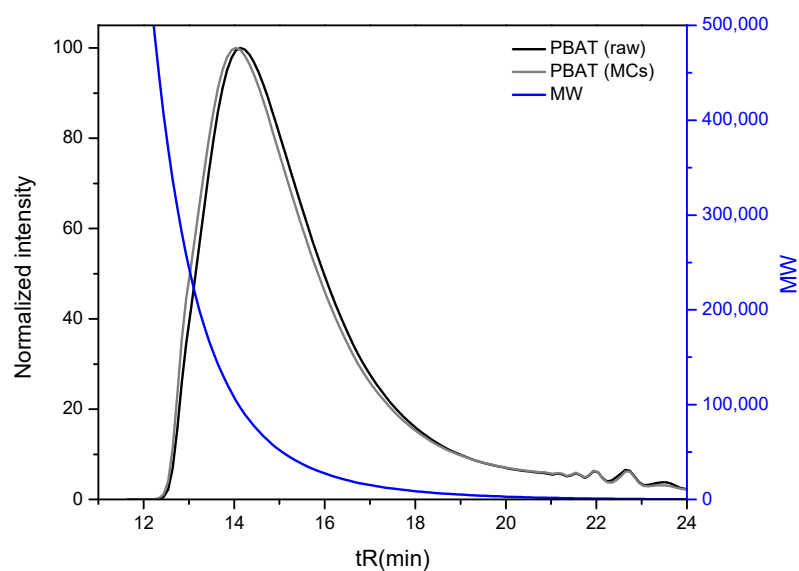

**Figure S1.** The GPC analysis performed for samples of PBAT, and MCs dissolved in chloroform

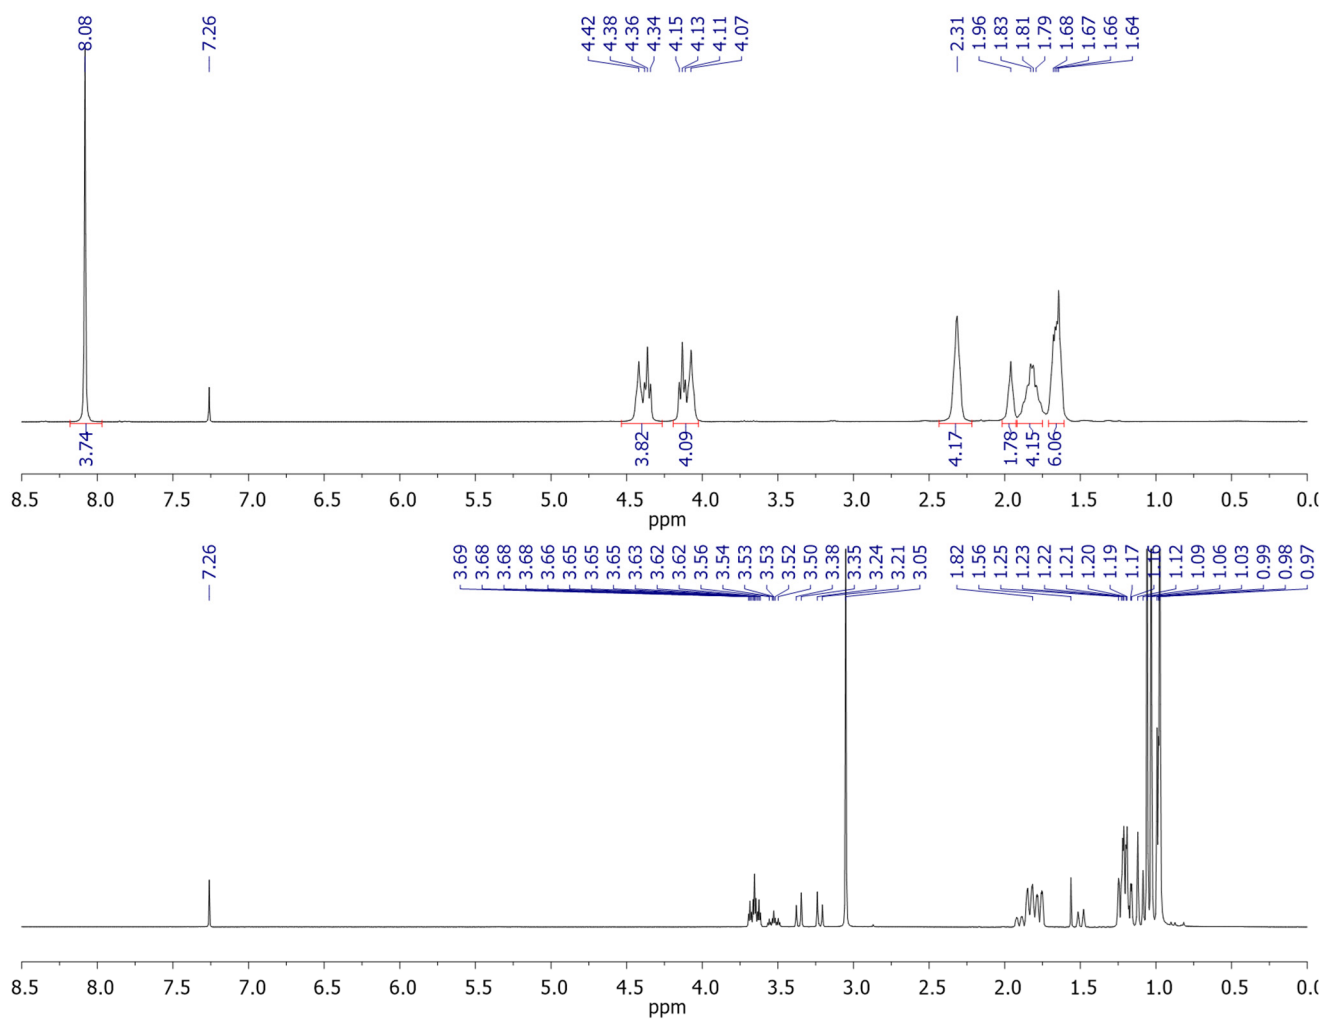

**Figure S2.**  $^1\text{H}$  NMR spectra of PBAT (up) and IPDI (down), in  $\text{CDCl}_3$ .

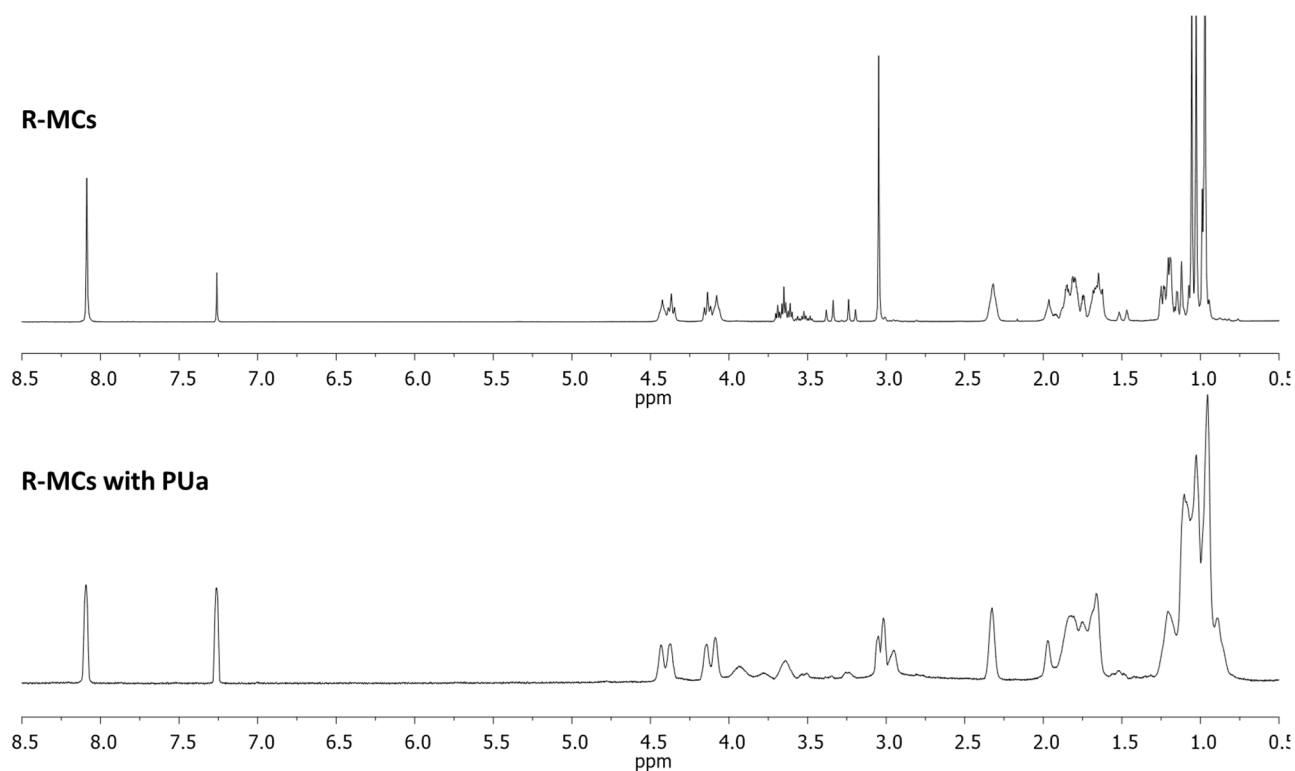

**Figure S3.**  $^1\text{H}$  NMR spectra of **R-MCs** and **R-MCs** with a significant weight percentage of **PUa**, in  $\text{CDCl}_3$ .

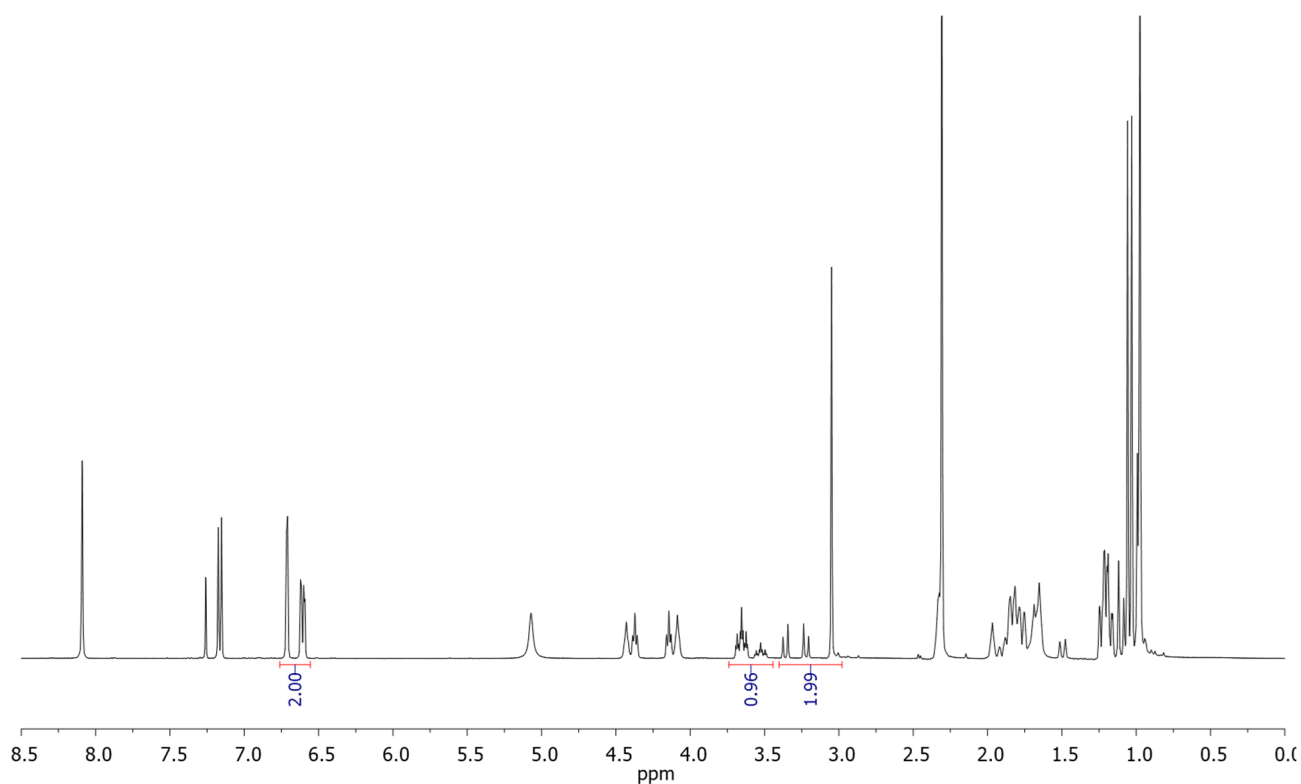

**Figure S4.**  $^1\text{H}$  NMR spectra of **R-MCs** (16.5 mg) + 4-chloro-3-methylphenol (7.5 mg), in  $\text{CDCl}_3$ .

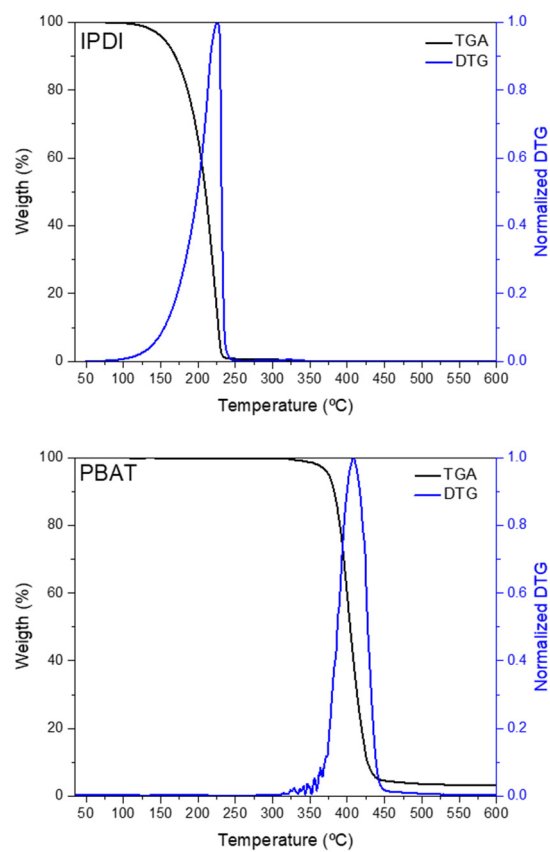

**Figure S5.** Thermogram and DTG of IPDI and PBAT.

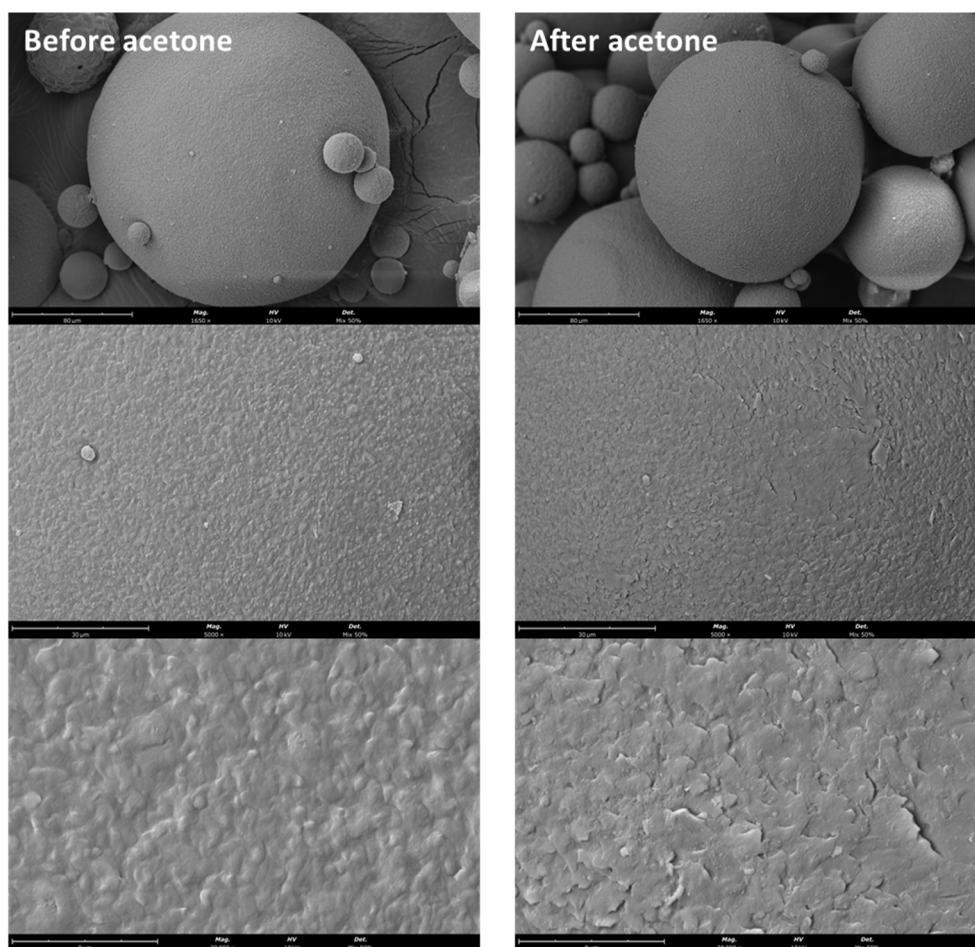

**Figure S6.** SEM images of the MCs before and after the dispersion in acetone.

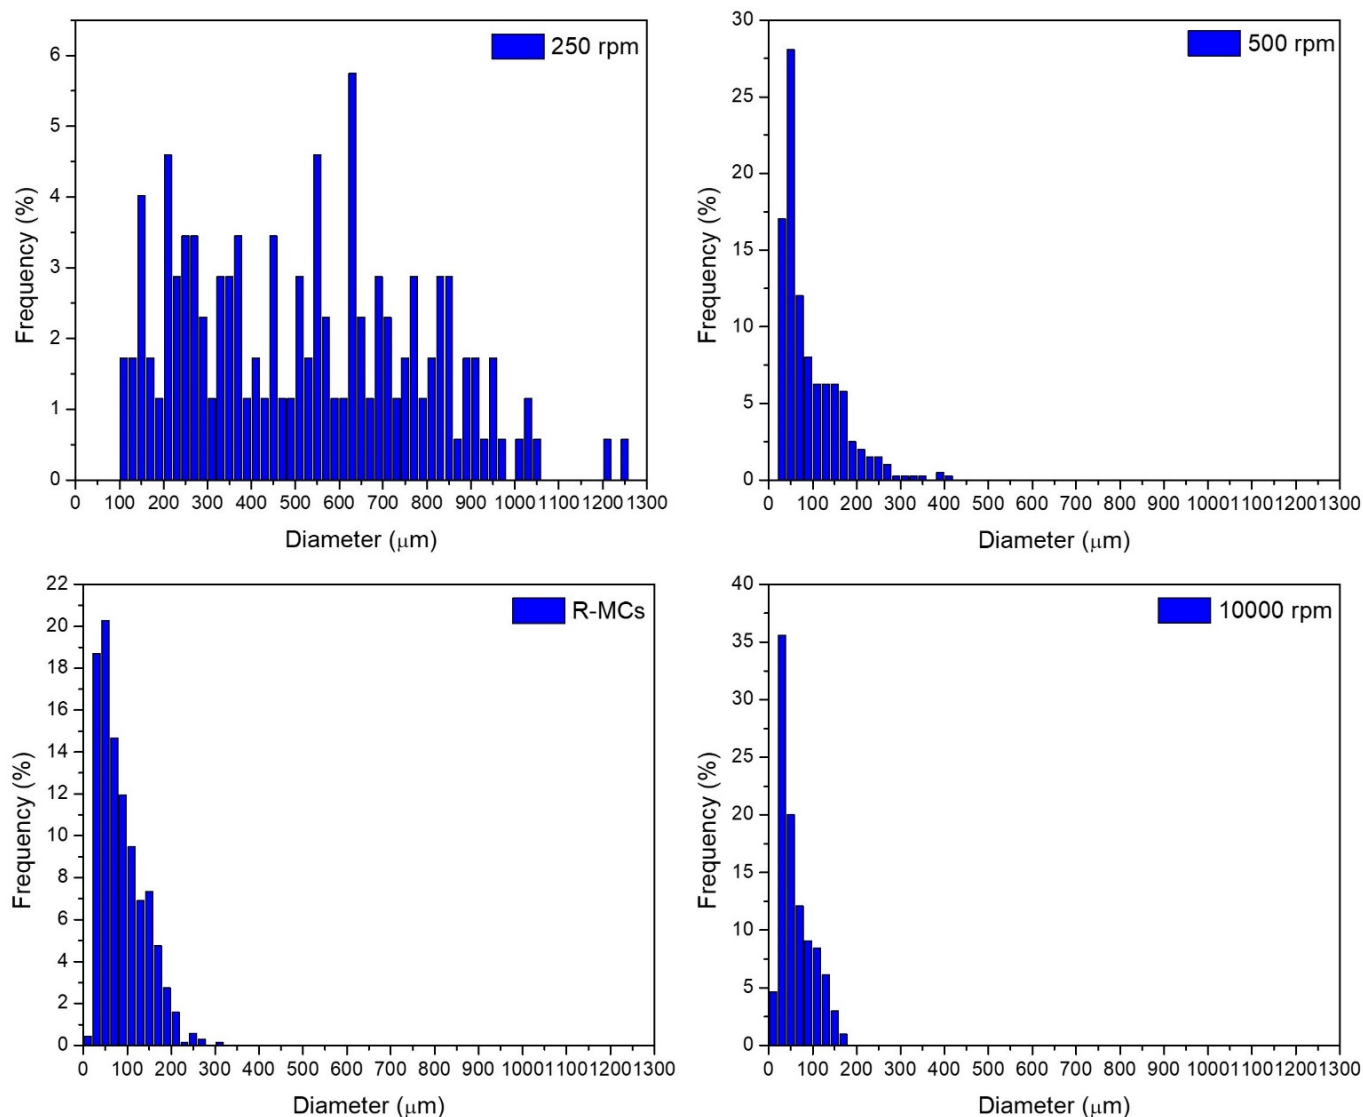

**Figure S7.** Histogram of the particle size distribution from the MCs obtained under different mixing rates.

**Table S1.** Set of statistical analysis tables regarding particle size distribution obtained under different mixing rates.

| Descriptive Statistics (stirring rate) |            |      |                    |            |      |      |        |      |      |
|----------------------------------------|------------|------|--------------------|------------|------|------|--------|------|------|
| MCs                                    | N Analysis | Mean | Standard deviation | SE of Mean | Min  | Q1   | Median | Q3   | Max  |
| 250 rpm                                | 174        | 521  | 521                | 19.9       | 106  | 287  | 523    | 718  | 1249 |
| 500 rpm                                | 399        | 236  | 236                | 8.38       | 50.9 | 112  | 166    | 323  | 1026 |
| 750 rpm                                | 539        | 107  | 107                | 3.03       | 15.5 | 48.6 | 86.2   | 147  | 368  |
| 1000 rpm                               | 604        | 61.0 | 61.0               | 1.55       | 8.92 | 29.9 | 49.0   | 85.4 | 178  |

| Kruskal–Wallis test (stirring rate) |    |        |
|-------------------------------------|----|--------|
| $\chi^2$ (Chi-Square)               | DF | p      |
| 889                                 | 3  | <0.001 |

At least two medians are different ( $p < 0.05$ ).

| Dwass–Steel–Critchlow–Fligner (stirring rate) |       |         |
|-----------------------------------------------|-------|---------|
|                                               | W     | p       |
| 500 rpm – 250 rpm                             | -17.9 | < 0.001 |
| 750 rpm – 250 rpm                             | -26.0 | < 0.001 |
| 750 rpm – 500 rpm                             | -28.2 | < 0.001 |
| 1000 rpm – 250 rpm                            | -21.3 | < 0.001 |
| 1000 rpm – 500 rpm                            | -32.8 | < 0.001 |
| 1000 rpm – 750 rpm                            | -17.5 | < 0.001 |

The difference is significant at the 0.05 level ( $p < 0.05$ ).

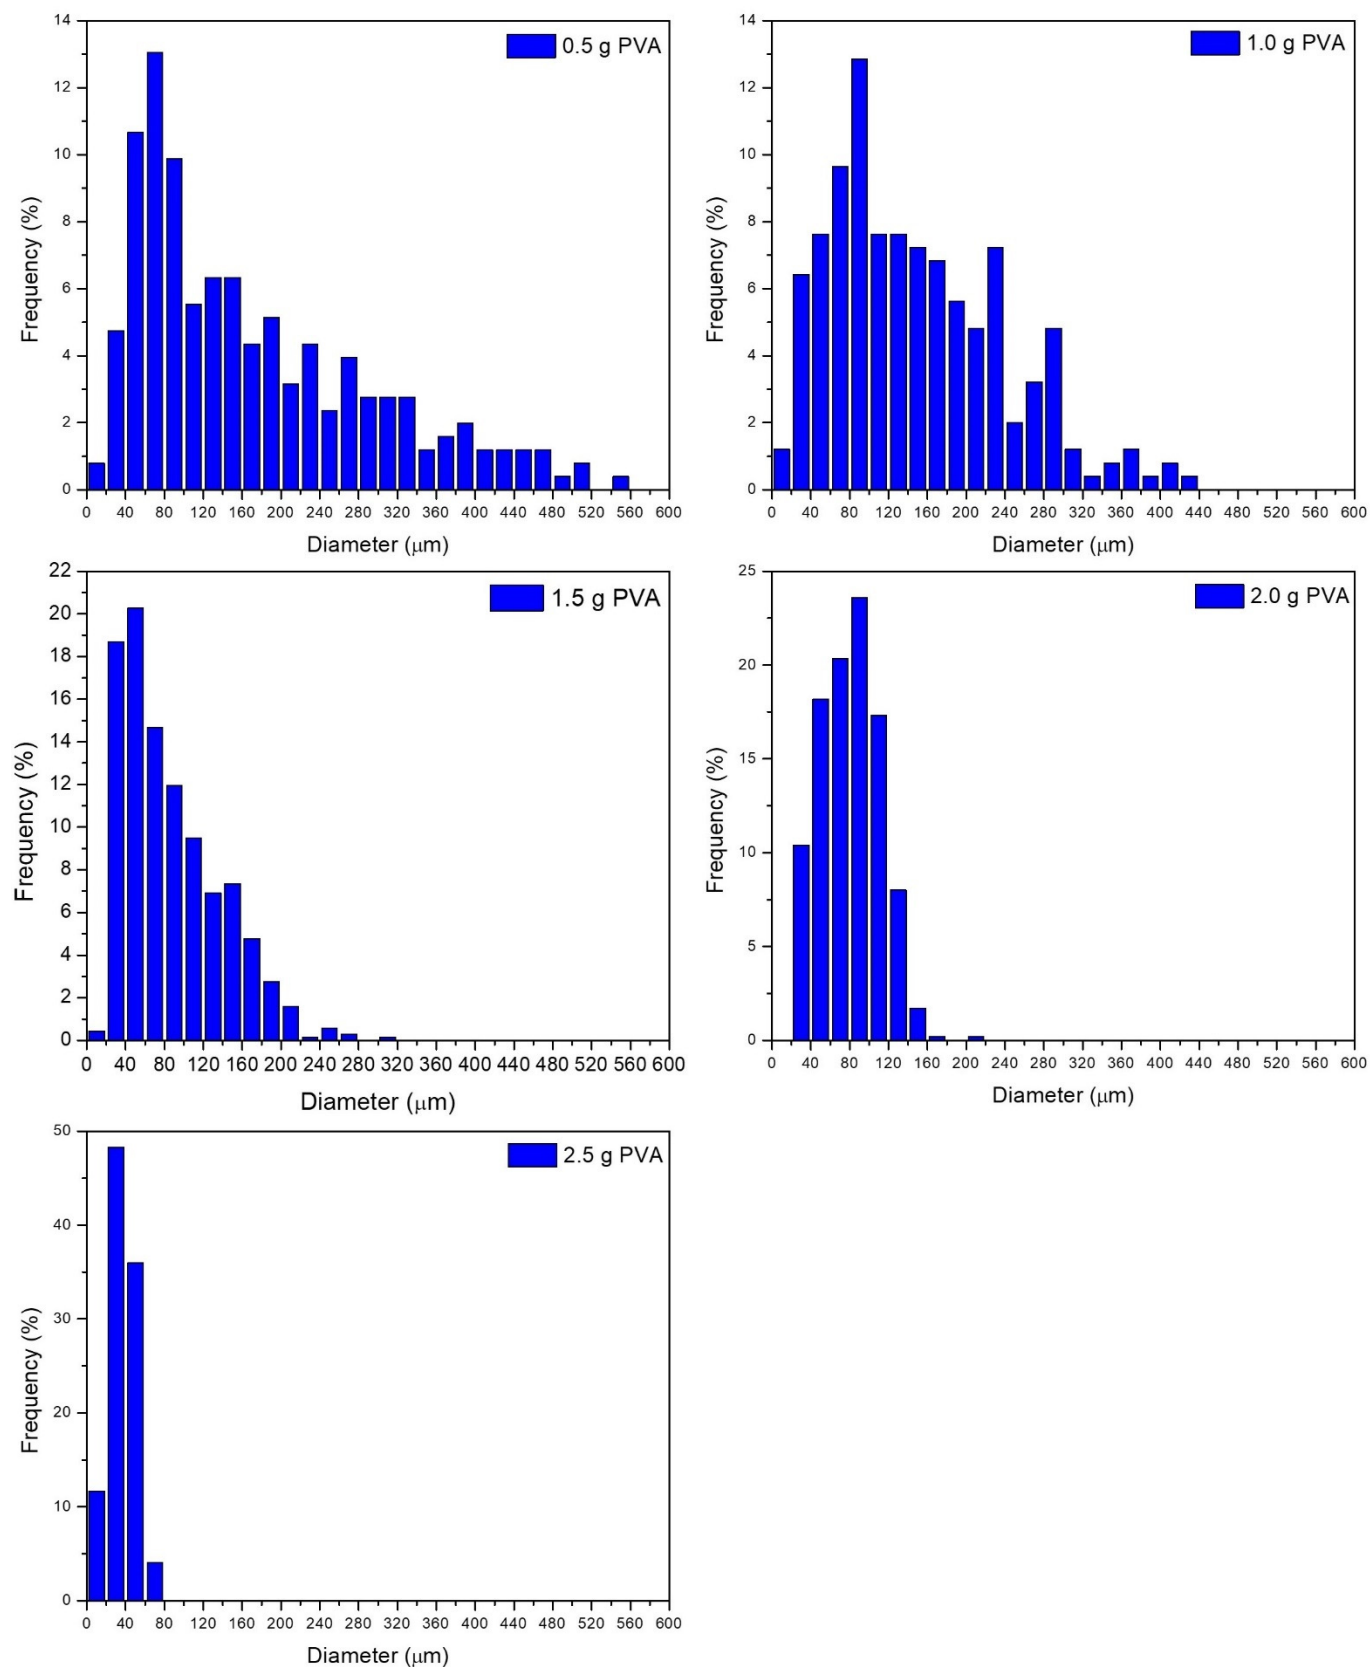

**Figure S8.** Histogram of the particle size distribution from the MCs obtained with different PVA amounts.

**Table S2.** Set of statistical analysis tables regarding particle size distribution obtained with different PVA amounts.

| <b>Descriptive Statistics (PVA amount)</b> |                   |             |                           |                   |            |           |               |           |            |
|--------------------------------------------|-------------------|-------------|---------------------------|-------------------|------------|-----------|---------------|-----------|------------|
| <b>MCs</b>                                 | <b>N Analysis</b> | <b>Mean</b> | <b>Standard deviation</b> | <b>SE of Mean</b> | <b>Min</b> | <b>Q1</b> | <b>Median</b> | <b>Q3</b> | <b>Max</b> |
| 0.5 g                                      | 253               | 171         | 121                       | 7.63              | 18.6       | 73.8      | 139           | 242       | 541        |
| 1.0 g                                      | 249               | 149         | 89.3                      | 5.66              | 17.1       | 80.1      | 133           | 213       | 421        |
| 1.5 g                                      | 539               | 107         | 70.3                      | 3.03              | 15.5       | 48.6      | 86.2          | 147       | 368        |
| 2.0 g                                      | 462               | 80.5        | 30.3                      | 1.41              | 21.4       | 56.3      | 81.1          | 102       | 212        |
| 2.5 g                                      | 642               | 36.5        | 13.5                      | 0.533             | 8.48       | 26.2      | 35.6          | 46.6      | 73.9       |

| <b>Kruskal–Wallis test (PVA amount)</b> |           |          |
|-----------------------------------------|-----------|----------|
| <b><math>\chi^2</math> (Chi-Square)</b> | <b>DF</b> | <b>p</b> |
| 962                                     | 4         | < 0.001  |

At least two medians are different ( $p < 0.05$ ).

| <b>Dwass–Steel–Critchlow–Fligner (PVA amount)</b> |          |          |
|---------------------------------------------------|----------|----------|
|                                                   | <b>W</b> | <b>p</b> |
| 1.0 g – 0.5 g                                     | -1.52    | 0.822    |
| 1.5 g – 0.5 g                                     | -10.24   | <0.001   |
| 2.0 g – 0.5 g                                     | -14.19   | < 0.001  |
| 2.5 g – 0.5 g                                     | -29.02   | < 0.001  |
| 1.0 g – 1.5 g                                     | -9.24    | < 0.001  |
| 1.0 g – 2.0g                                      | -14.70   | < 0.001  |
| 1.0 g – 2.5 g                                     | -28.38   | < 0.001  |
| 1.5 g – 2.0 g                                     | -5.03    | 0.003    |
| 1.5 g – 2.5 g                                     | -30.58   | < 0.001  |
| 2.0 g – 2.5 g                                     | -32.68   | < 0.001  |

The difference is significant at the 0.05 level ( $p < 0.05$ ).

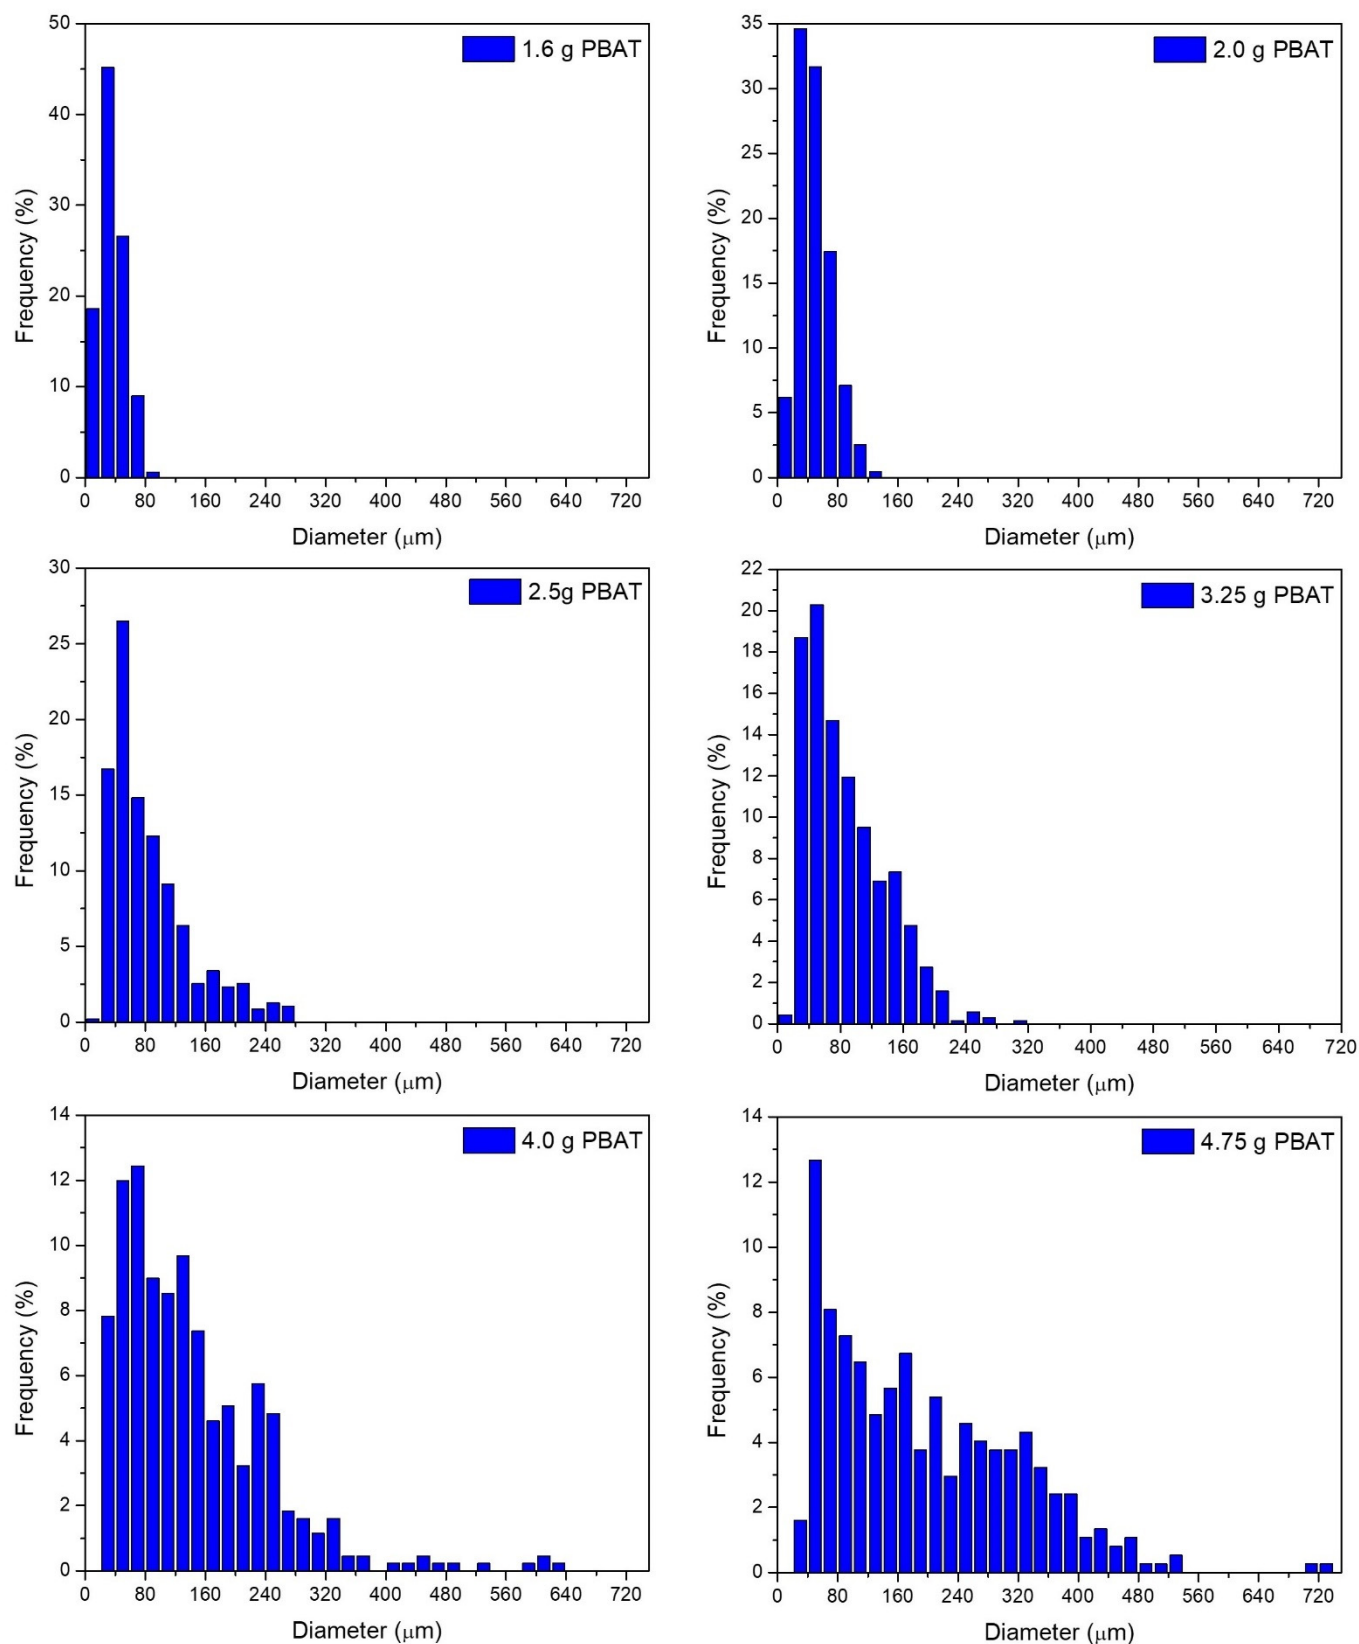

**Figure S9.** Histogram of the particle size distribution from the MCs obtained with different PBAT amounts.



**Table S3.** Set of statistical analysis tables regarding particle size distribution obtained with different PBAT amounts.

| <b>Descriptive Statistics (PBAT amount)</b> |                   |             |                           |                   |            |           |               |           |            |
|---------------------------------------------|-------------------|-------------|---------------------------|-------------------|------------|-----------|---------------|-----------|------------|
| <b>MCs</b>                                  | <b>N Analysis</b> | <b>Mean</b> | <b>Standard deviation</b> | <b>SE of Mean</b> | <b>Min</b> | <b>Q1</b> | <b>Median</b> | <b>Q3</b> | <b>Max</b> |
| 1.6 g                                       | 500               | 35.6        | 16.1                      | 0.718             | 8.10       | 23.1      | 34.0          | 46.3      | 84.2       |
| 2.0 g                                       | 436               | 48.6        | 22.2                      | 1.07              | 8.25       | 31.6      | 44.7          | 62.2      | 123        |
| 2.25 g                                      | 472               | 85.8        | 53.9                      | 2.48              | 17.9       | 45.8      | 67.1          | 109       | 271        |
| 3.25 g                                      | 539               | 107         | 70.3                      | 3.03              | 15.5       | 48.6      | 86.2          | 147       | 368        |
| 4.0 g                                       | 434               | 143         | 99.5                      | 4.77              | 21.7       | 69.3      | 120           | 191       | 622        |
| 4.75 g                                      | 371               | 195         | 125                       | 6.51              | 26.5       | 86.7      | 169           | 284       | 722        |

  

| <b>Kruskal–Wallis test (PBAT amount)</b> |           |          |
|------------------------------------------|-----------|----------|
| <b><math>\chi^2</math> (Chi-Square)</b>  | <b>DF</b> | <b>p</b> |
| 1179                                     | 5         | < .001   |

At least two medians are different ( $p < 0.05$ ).

| <b>Dwass–Steel–Critchlow–Fligner (PBAT amount)</b> |          |          |
|----------------------------------------------------|----------|----------|
|                                                    | <b>W</b> | <b>p</b> |
| 1.6 g – 2.0 g                                      | 12.87    | <0 .001  |
| 1.6 g – 2.5 g                                      | 26.99    | < 0.001  |
| 1.6 g – 3.25 g                                     | 29.14    | < 0.001  |
| 1.6 g – 4.0 g                                      | 32.30    | < 0.001  |
| 1.6 g – 4.75 g                                     | 33.17    | < 0.001  |
| 2.0 g – 2.5 g                                      | 17.10    | < 0.001  |
| 2.0 g – 3.25 g                                     | 20.76    | < 0.001  |
| 2.0 g – 4.0 g                                      | 26.68    | < 0.001  |
| 2.0 g – 4.75 g                                     | 28.84    | < 0.001  |
| 2.5 g – 3.25 g                                     | 5.77     | < 0.001  |
| 2.5 g – 4.0 g                                      | 14.55    | < 0.001  |
| 2.5 g – 4.75 g                                     | 20.23    | < 0.001  |
| 3.25g – 4.0 g                                      | 8.76     | < 0.001  |
| 3.25 g – 4.75                                      | 16.25    | < 0.001  |
| 4.0 g – 4.75 g                                     | 8.48     | < 0.001  |

The difference is significant at the 0.05 level ( $p < 0.05$ ).

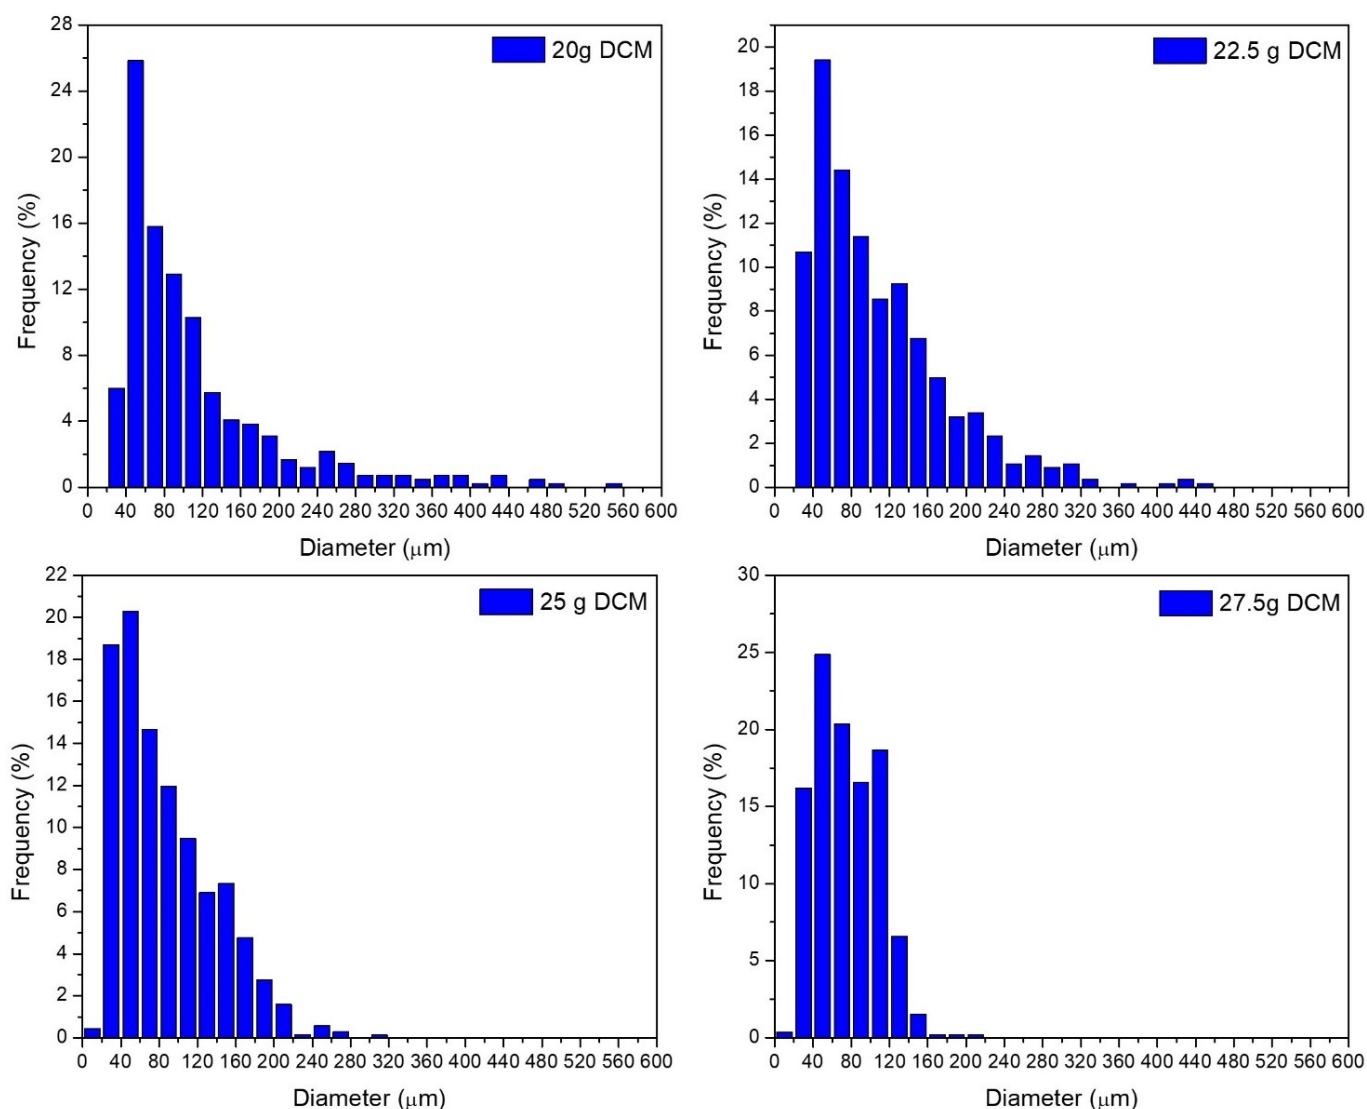

**Figure S10.** Histogram of the particle size distribution from the MCs obtained with different DCM amounts.

**Table S4.** Set of statistical analysis tables regarding particle size distribution obtained with different DCM amounts.

| Descriptive Statistics (Amount of DCM) |            |      |                    |            |      |      |        |     |     |
|----------------------------------------|------------|------|--------------------|------------|------|------|--------|-----|-----|
| MCs                                    | N Analysis | Mean | Standard deviation | SE of Mean | Min  | Q1   | Median | Q3  | Max |
| 20.0 g                                 | 418        | 112  | 88.1               | 4.31       | 25.5 | 54.9 | 83.7   | 132 | 550 |
| 22.5 g                                 | 562        | 109  | 71.5               | 3.02       | 20.6 | 53.5 | 91.5   | 144 | 441 |
| 25.0 g                                 | 539        | 107  | 70.3               | 3.03       | 15.5 | 48.6 | 86.2   | 147 | 368 |
| 27.5 g                                 | 561        | 74.5 | 32.3               | 1.36       | 19.5 | 46.2 | 69.6   | 100 | 211 |

| Kruskal–Wallis test (Amount of DCM) |    |         |
|-------------------------------------|----|---------|
| $\chi^2$ (Chi-Square)               | DF | p       |
| 69.5                                | 3  | < 0.001 |

At least two medians are different ( $p < 0.05$ ).

| Dwass–Steel–Critchlow–Fligner (Amount of DCM) |         |         |
|-----------------------------------------------|---------|---------|
|                                               | W       | p       |
| 20.0 g – 22.5 g                               | 1.135   | 0.853   |
| 20.0 g – 25.0 g                               | -0.774  | 0.947   |
| 20.0 g – 27.5 g                               | -8.344  | < 0.001 |
| 22.5 g – 25.0 g                               | -1.609  | 0.666   |
| 22.5 g – 27.5 g                               | -10.964 | < 0.001 |
| 25.0 g – 27.5 g                               | -8.605  | < 0.001 |

The difference is significant at the 0.05 level ( $p < 0.05$ ).

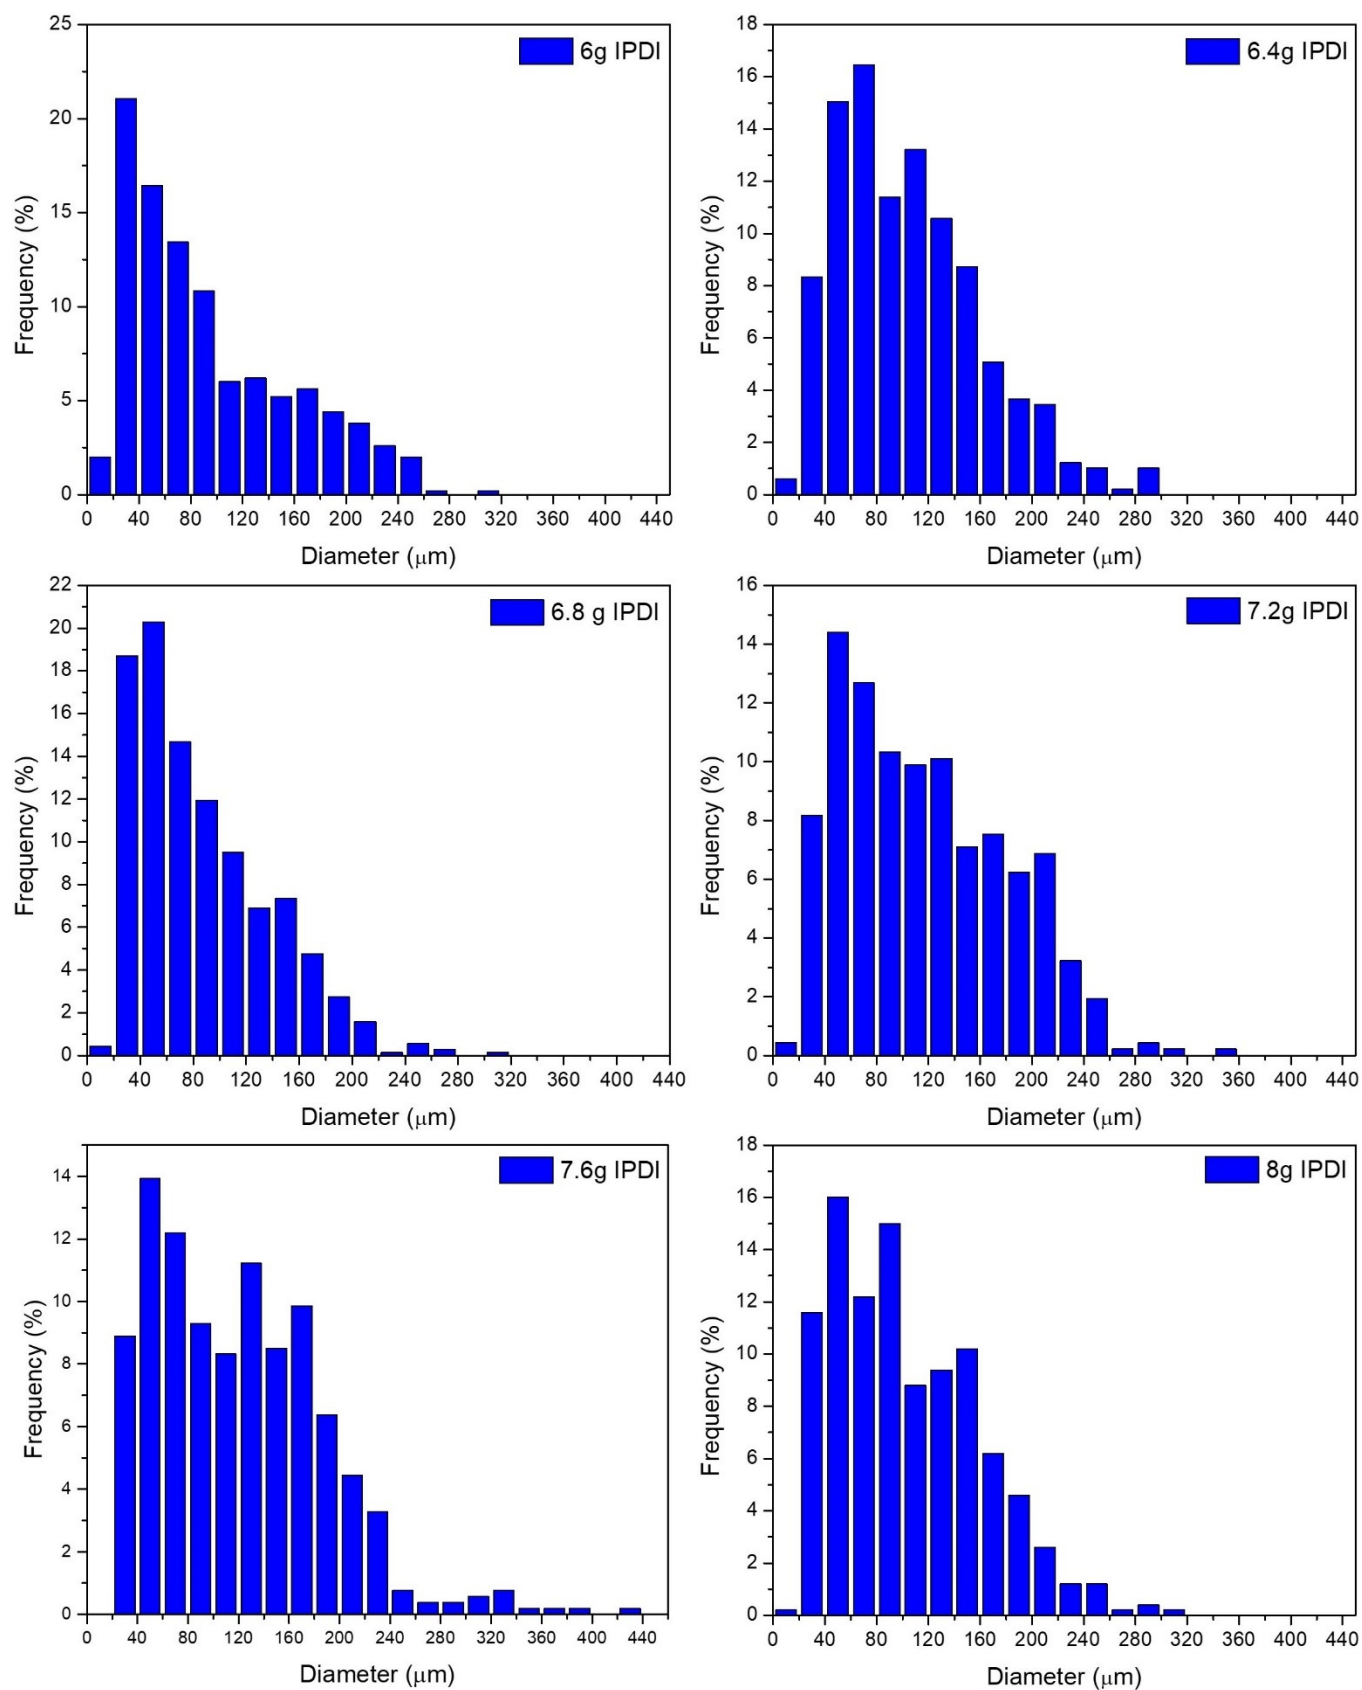

**Figure S11.** Histogram of the particle size distribution from the MCs obtained with different IPDI amounts.

**Table S5.** Set of statistical analysis tables regarding particle size distribution obtained with different DCM amounts.

| Descriptive Statistics (Amount of IPDI) |            |       |                    |            |      |      |        |     |     |
|-----------------------------------------|------------|-------|--------------------|------------|------|------|--------|-----|-----|
| MCs                                     | N Analysis | Mean  | Standard deviation | SE of Mean | Min  | Q1   | Median | Q3  | Max |
| 6.0 g                                   | 500        | 94.3  | 63.1               | 2.82       | 10.2 | 41.6 | 75.1   | 136 | 304 |
| 6.4 g                                   | 492        | 105.1 | 55.6               | 2.51       | 15.6 | 61.0 | 97.6   | 138 | 299 |
| 6.8 g                                   | 539        | 106.6 | 70.3               | 3.03       | 15.5 | 48.6 | 86.2   | 147 | 368 |
| 7.2 g                                   | 465        | 117.3 | 63.4               | 2.94       | 19.3 | 62.7 | 107.8  | 164 | 354 |
| 7.6 g                                   | 517        | 120.2 | 68.2               | 3.00       | 20.3 | 64.0 | 115.8  | 165 | 435 |
| 8.0 g                                   | 500        | 103.8 | 56.4               | 2.52       | 14.3 | 56.4 | 94.0   | 144 | 315 |

| Kruskal–Wallis test (Amount of IPDI) |    |         |
|--------------------------------------|----|---------|
| $\chi^2$ (Chi-Square)                | DF | p       |
| 65.0                                 | 5  | < 0.001 |

At least two medians are different ( $p < 0.05$ ).

| Dwass–Steel–Critchlow–Fligner (Amount of IPDI) |        |         |
|------------------------------------------------|--------|---------|
|                                                | W      | p       |
| 6.0 g – 6.4 g                                  | 6.038  | <0 .001 |
| 6.0 g – 6.8 g                                  | 4.055  | 0.048   |
| 6.0 g – 7.2 g                                  | 8.922  | < 0.001 |
| 6.0 g – 7.6 g                                  | 9.385  | < 0.001 |
| 6.0 g – 8.0 g                                  | 5.227  | 0.003   |
| 6.4 g – 6.8 g                                  | -2.042 | 0.700   |
| 6.4 g – 7.2 g                                  | 3.713  | 0.091   |
| 6.4 g – 7.6 g                                  | 4.503  | 0.018   |
| 6.4 g – 8.0 g                                  | -0.729 | 0.996   |
| 6.8 g – 7.2 g                                  | 5.165  | 0.004   |
| 6.8 g – 7.6 g                                  | 5.623  | < 0.001 |
| 6.8 g – 8.0 g                                  | 1.161  | 0.964   |
| 7.2 g – 7.6 g                                  | 0.404  | 1.000   |
| 7.2. g – 8.0 g                                 | -4.454 | 0.020   |
| 7.6 g – 8.0 g                                  | -5.071 | 0.005   |

The difference is significant at the 0.05 level ( $p < 0.05$ ).

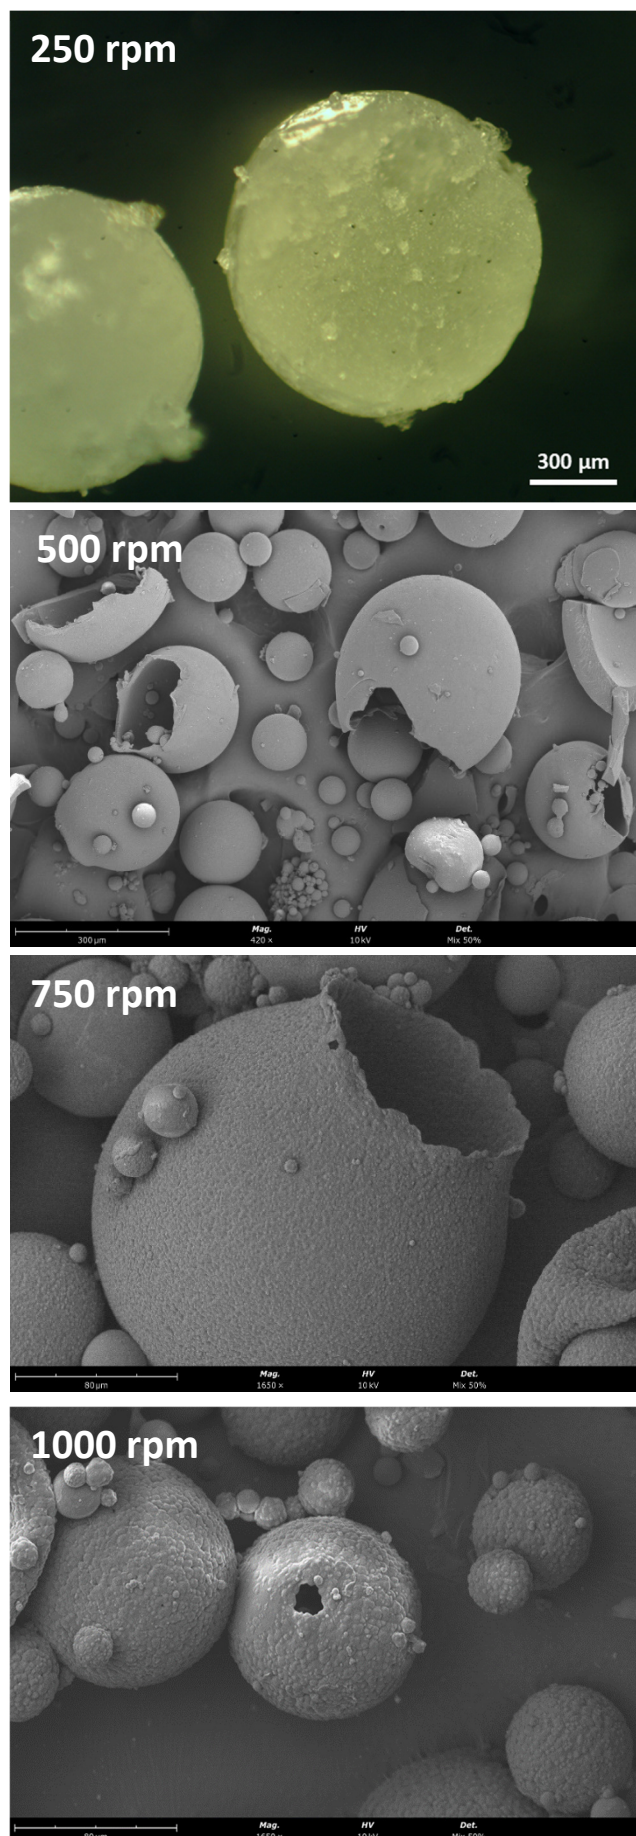

**Figure S12.** Optical microscopy photograph (250 rpm) and SEM images of the MCs obtained under different mixing rates.

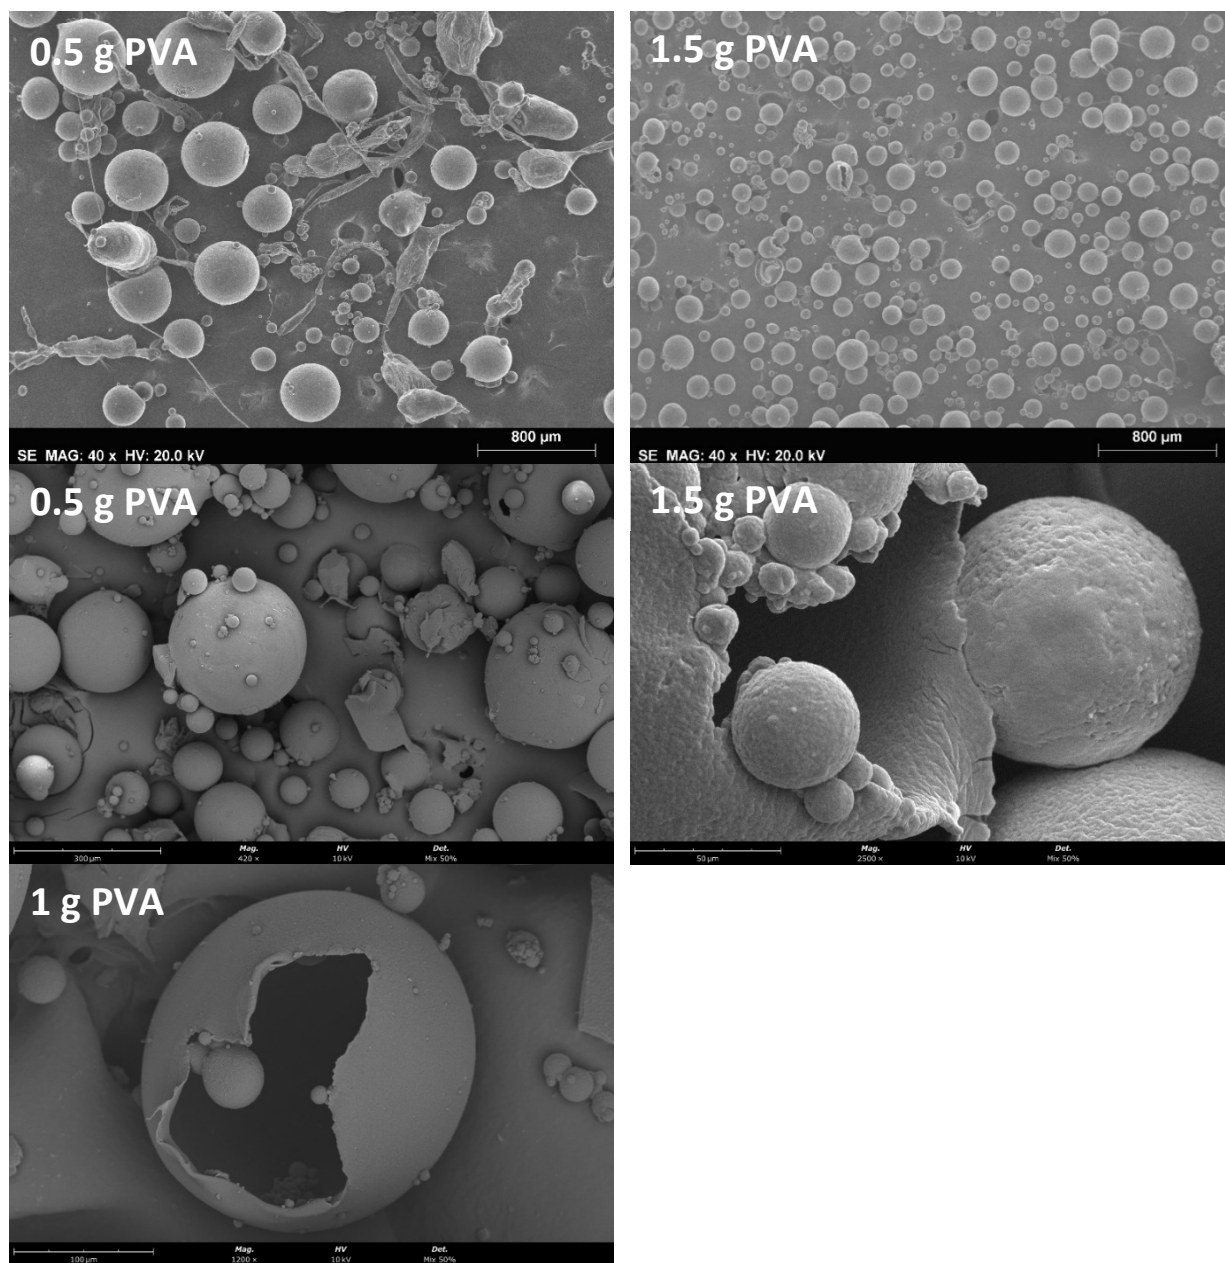

**Figure S13.** SEM images of the MCs obtained with 0.5, 1 and 1.5 g of PVA

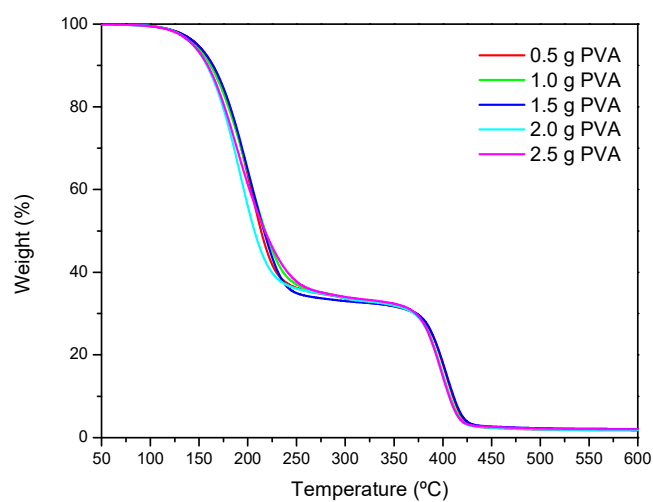

**Figure S14.** TG analysis from the MCs obtained with different PVA amounts.



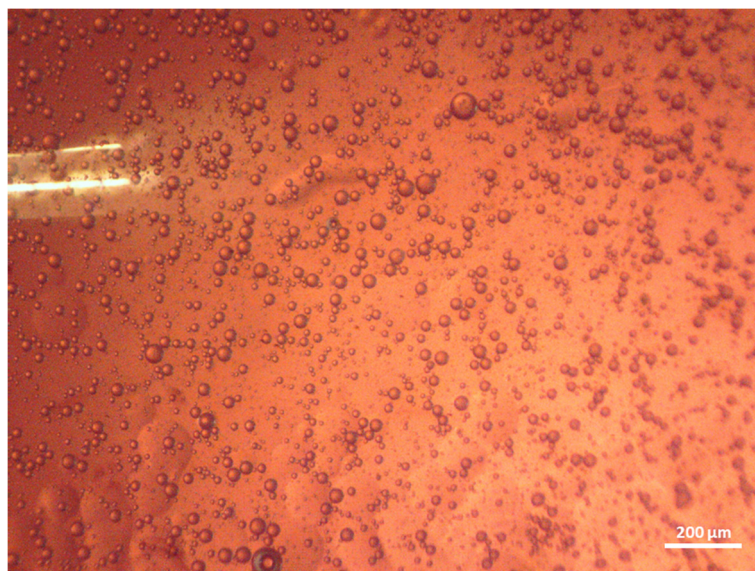

**Figure S15.** Optical microscopy photograph from the MCs obtained with 2g of PBAT.

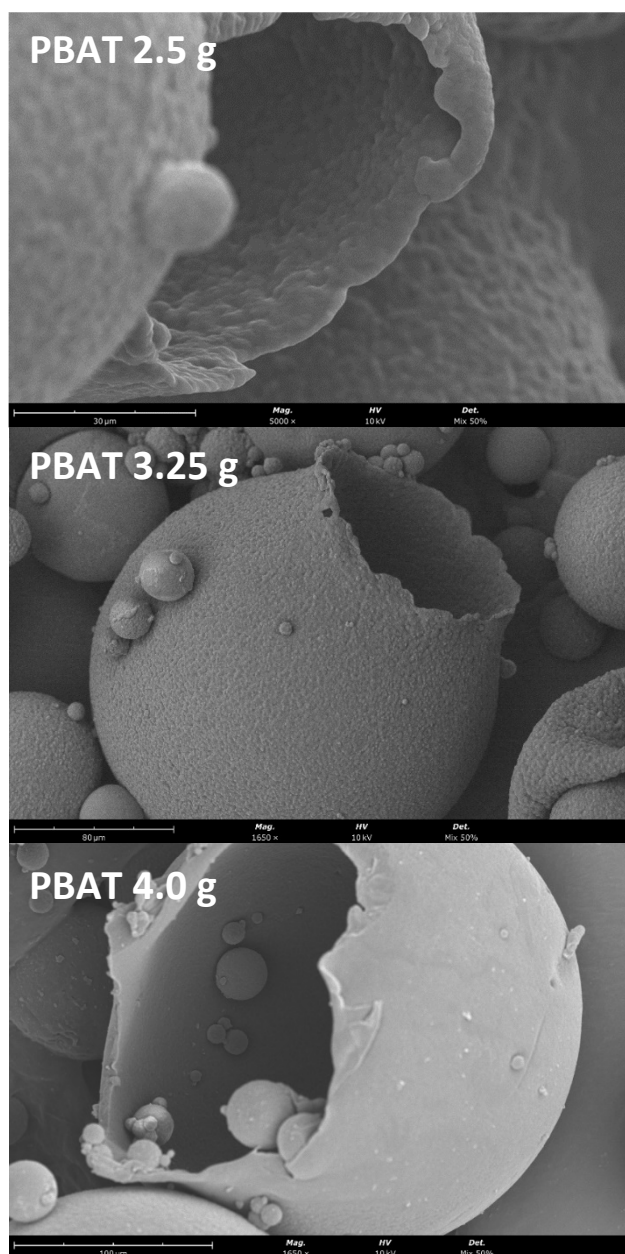

**Figure S16.** SEM images of MCs obtained with different PBAT amounts.

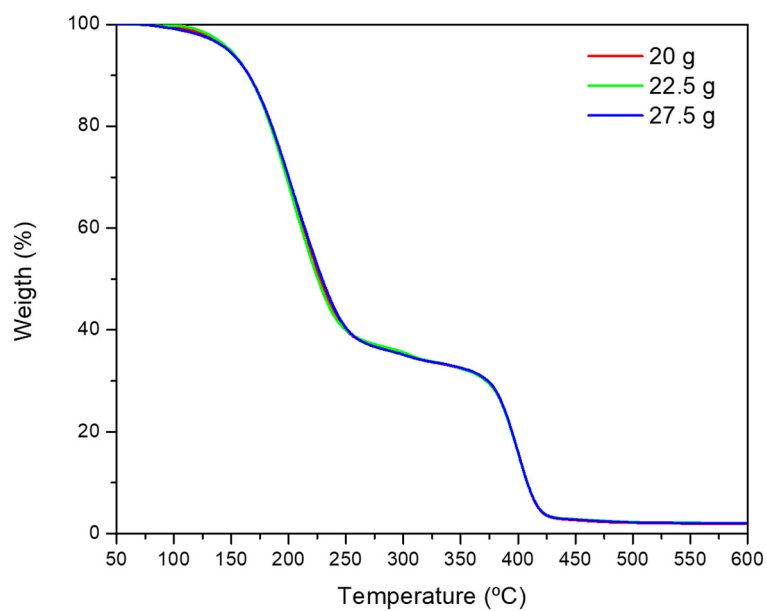

**Figure S17.** TG analysis from the MCs obtained with different DCM amounts.

**Table S6.** Variation of the viscosity of the emulsions with the increase of IPDI.

| IPDI(g) | Emulsion viscosity (cP) | Mean size ( $\mu\text{m}$ ) |
|---------|-------------------------|-----------------------------|
| 6.00    | $75.83 \pm 1.72$        | $94 \pm 63$                 |
| 6.40    | $68.53 \pm 0.28$        | $105 \pm 56$                |
| 6.80    | $61.35 \pm 0.71$        | $107 \pm 70$                |
| 7.20    | $54.04 \pm 1.21$        | $117 \pm 63$                |
| 7.60    | $49.12 \pm 1.25$        | $120 \pm 68$                |
| 8.00    | $40.82 \pm 0.29$        | $104 \pm 56$                |
